# Supplementary material for: Spirit-Quieting Traditional Chinese Medicine May Improve Survival in Prostate Cancer Patients with Depression
Source: PubMed Central journal article supplement (PMC6406565; doi:10.3390/jcm8020218), 2019-02-08
Supplement: jcm-08-00218-s001.pdf [file jcm-08-00218-s001.pdf]

**Table S1** The herbal composition of six formulae for the treatment of depression in the manuscript

| Chinese Medicine<br>Formulae  | Herbal Composition                                                                                                                                                                                                                                                                                                                                                                                                                                                                                                                                                                                                                                                                    |
|-------------------------------|---------------------------------------------------------------------------------------------------------------------------------------------------------------------------------------------------------------------------------------------------------------------------------------------------------------------------------------------------------------------------------------------------------------------------------------------------------------------------------------------------------------------------------------------------------------------------------------------------------------------------------------------------------------------------------------|
| Wen-Dan-Tang<br>溫膽湯           | Pinellia ternata (Thunb.) Breit., Citrus reticulata Blanco, Poria cocos (Schw.) Wolf, Glycyrrhiza uralensis Fisch., Bambusa tuldoidea Munro, Citrus aurantium L., Zingiber officinale Rosc., Ziziphus jujuba Mill.<br>Asparagus cochinchinensis (Lour.) Merr., Panax ginseng C. A. Mey., Poria cocos (Schw.) Wolf, Scrophularia ningpoensis Hemsl., Salvia miltiorrhiza Bge., Polygala tenuifolia Willd., Platycodon grandiflorum (Jaoq.) A.DC., Angelica sinensis (Oliv.) Diels, Schisandra chinensis (Turcz.), Ophiopogon japonicus (L.f.) Ker-Gawl., Platycladus orientalis (L.) Franco, Ziziphus jujuba Mill. var. spinosa (Bunge) Hu ex H. F. Chou., Rehmannia glutinosa Libosch |
| Tian-Wang-Bu-Xin-Dan<br>天王補心丹 | Ziziphus jujuba Mill. var. spinosa (Bunge) Hu ex H. F. Chou., Glycyrrhiza uralensis Fisch., Anemarrhena asphodeloides Bge., Poria cocos (Schw.) Wolf, Ligusticum sinense Hort.<br>Angelica sinensis (Oliv.) Diels, Poria cocos (Schw.) Wolf, Gardenia jasminoides Ellis, Mentha haplocalyx Briq., Paeonia lactiflora Pall., Bupleurum chinensis DC, Glycyrrhiza uralensis Fisch., Atractylodes macrocephala Koidz., Paeonia suffruticosa Andr., Zingiber officinale Rosc.                                                                                                                                                                                                             |
| Suan-Zao-Ren-Tang<br>酸棗仁湯     | Glycyrrhiza uralensis Fisch., Triticum aestivum L., Ziziphus jujuba Mill.                                                                                                                                                                                                                                                                                                                                                                                                                                                                                                                                                                                                             |
| Jia-Wei-Xiao-Yao-San<br>加味逍遙散 |                                                                                                                                                                                                                                                                                                                                                                                                                                                                                                                                                                                                                                                                                       |
| Gan-Mai-Da-Zao-Tang<br>甘麥大棗湯  |                                                                                                                                                                                                                                                                                                                                                                                                                                                                                                                                                                                                                                                                                       |
